# Supplementary material
Source: ML conference proceedings conference paper supplement (https://openreview.net/forum?id=50hs53Zb3w)

Objective  $\mathcal{F}_{\text{sp}, \delta_k}(\mathbf{X}^{(k)})$  IRLS Objective  $\mathcal{F}_{\text{lr}, \varepsilon_k, \delta_k}(\mathbf{X}^{(k)})$

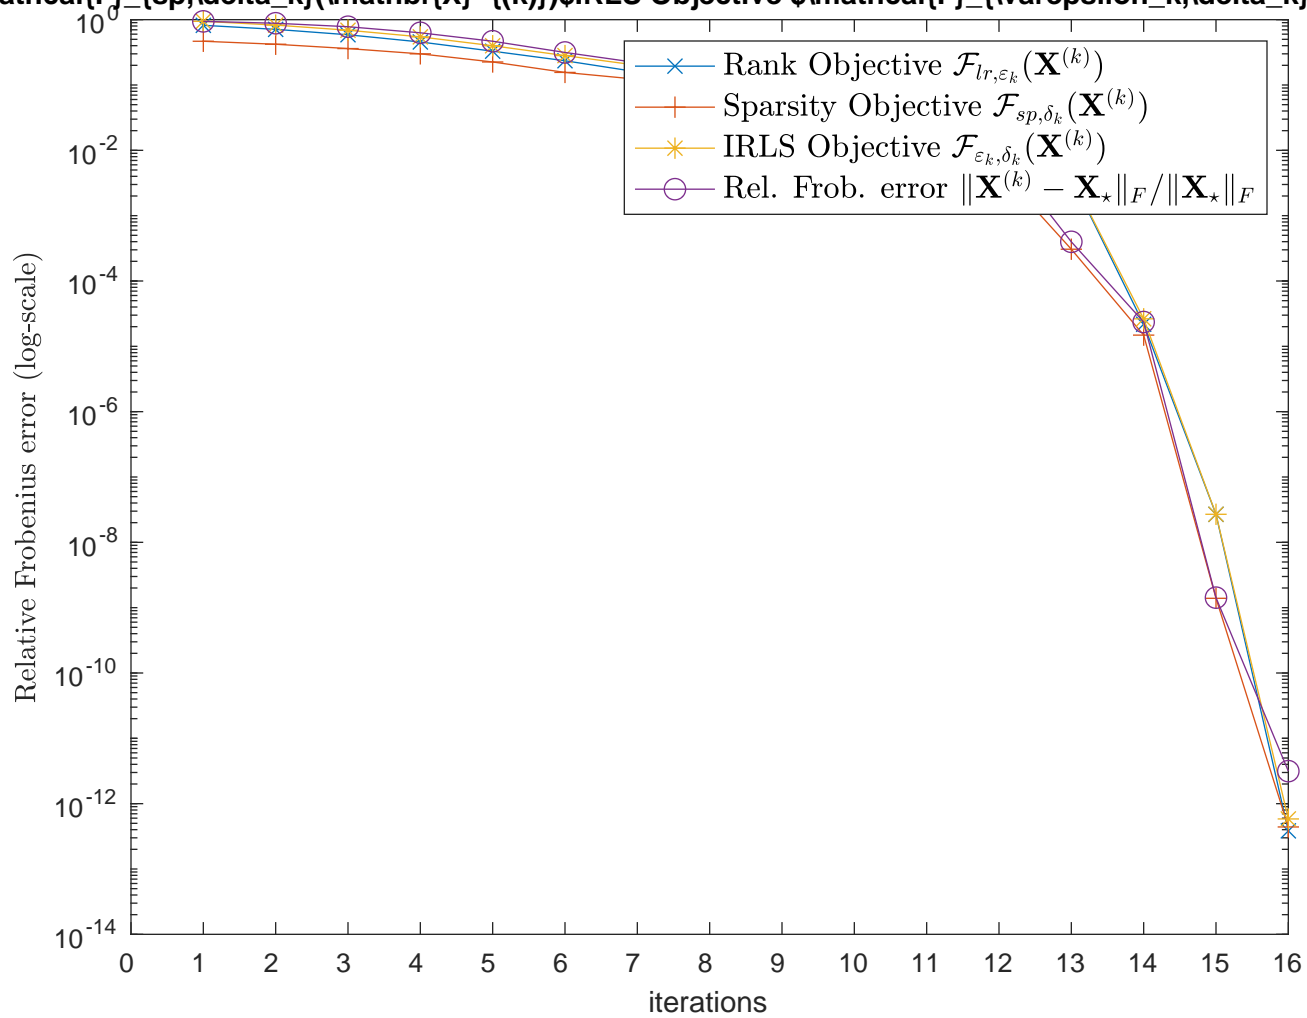

Supplement: supplementary_material [file attachment]
