# Supplementary material
Source: ML conference proceedings conference paper supplement (https://openreview.net/forum?id=50hs53Zb3w)

Riemannian Adaptive IHT, Gaussian measurements

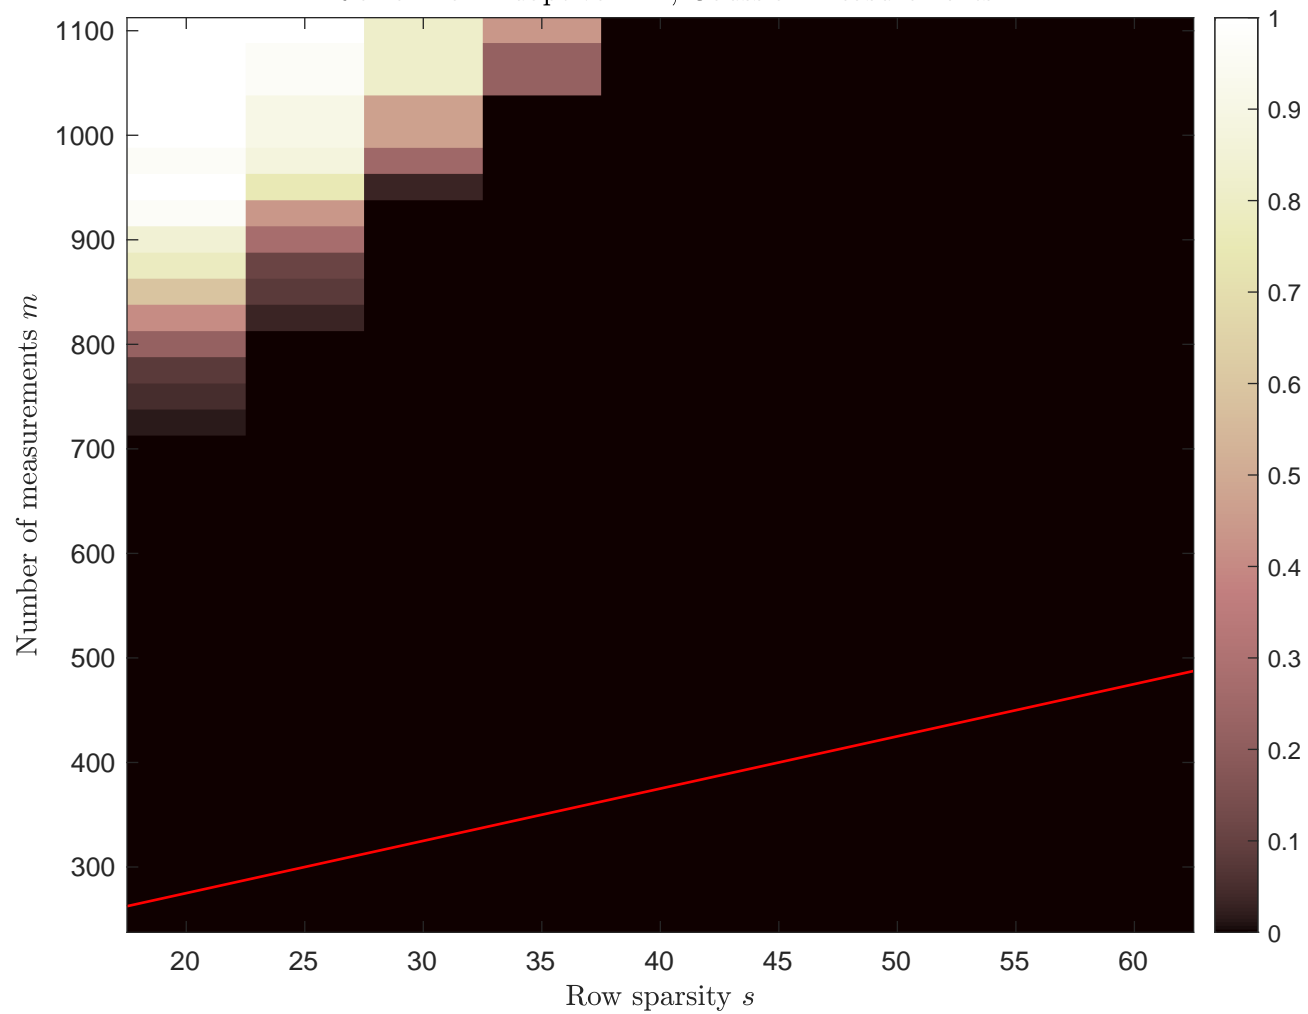

Supplement: supplementary_material [file attachment]

Sparse Power Factorization, Gaussian measurements

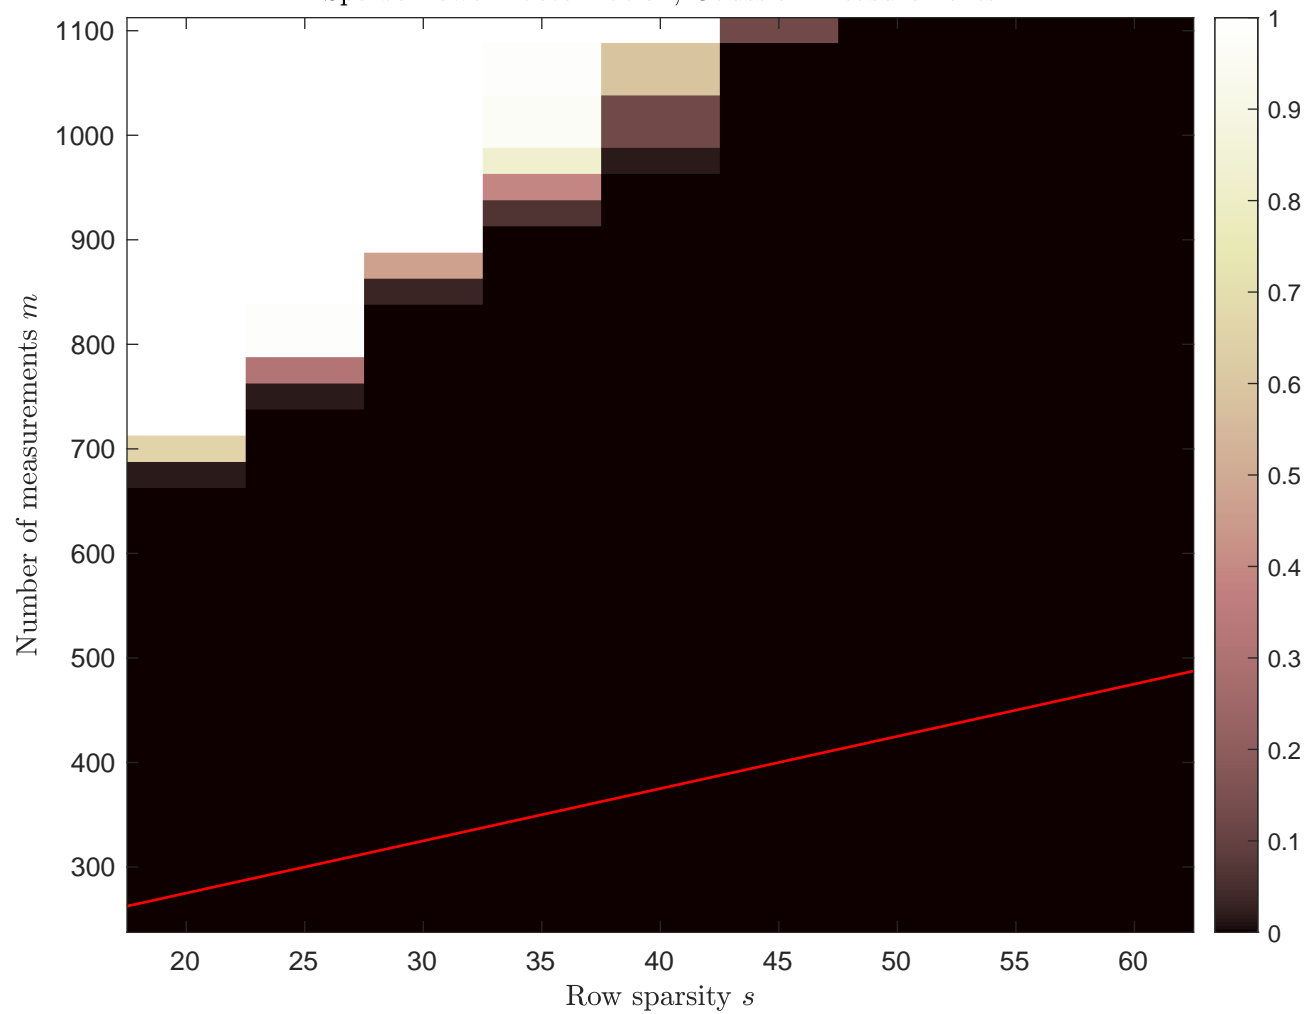

Supplement: supplementary_material [file attachment]

IRLS-LowRankRowSparse, Fourier measurements

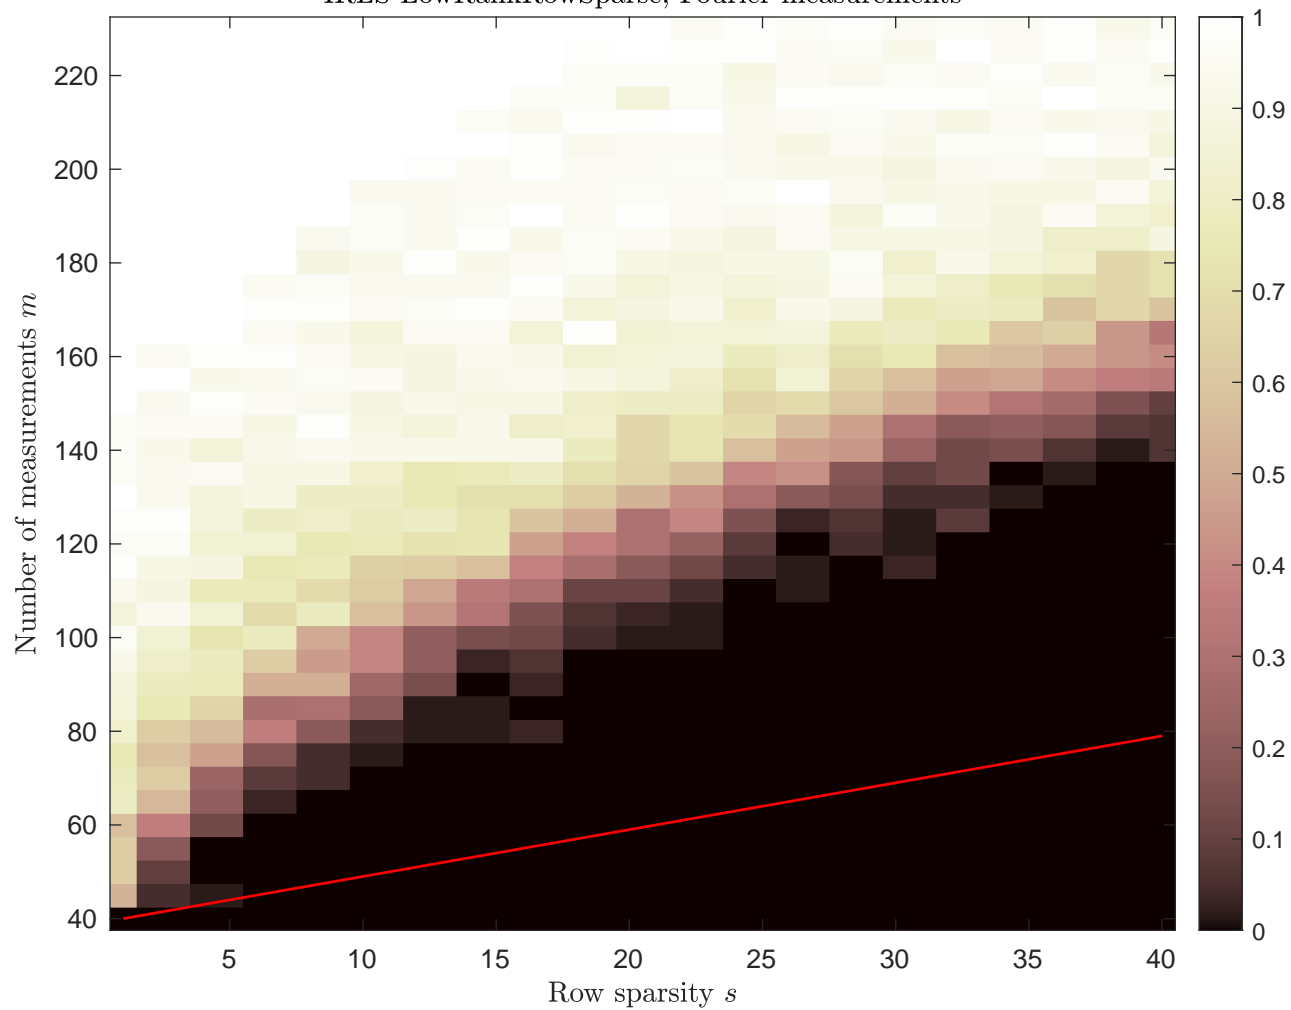

Supplement: supplementary_material [file attachment]

Sparse Power Factorization, Fourier Measurements

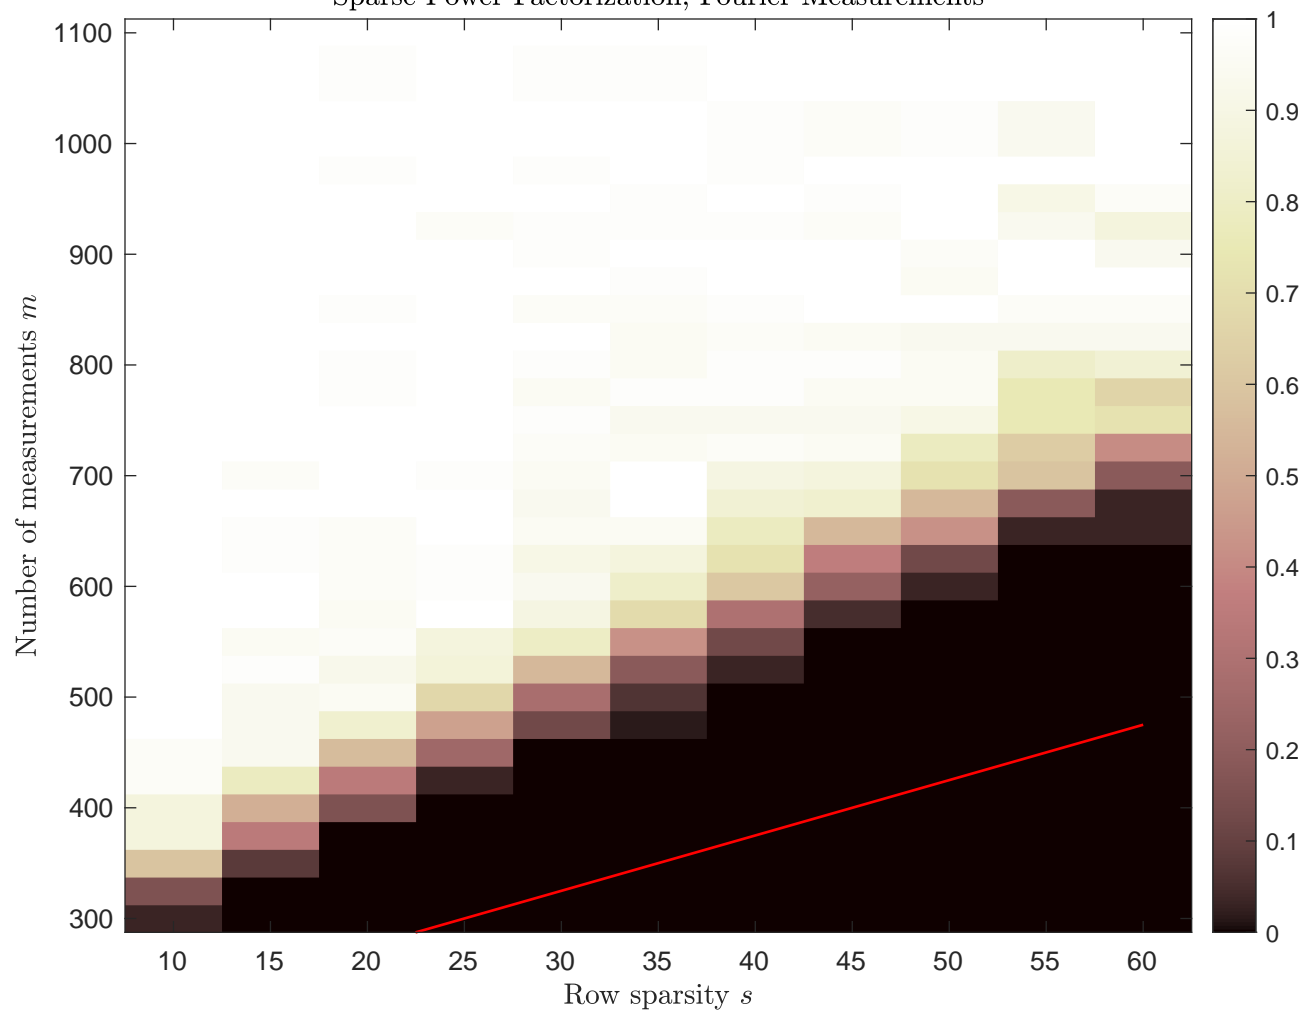

Supplement: supplementary_material [file attachment]

IRLS-LowRankRowSparse, Gaussian measurements

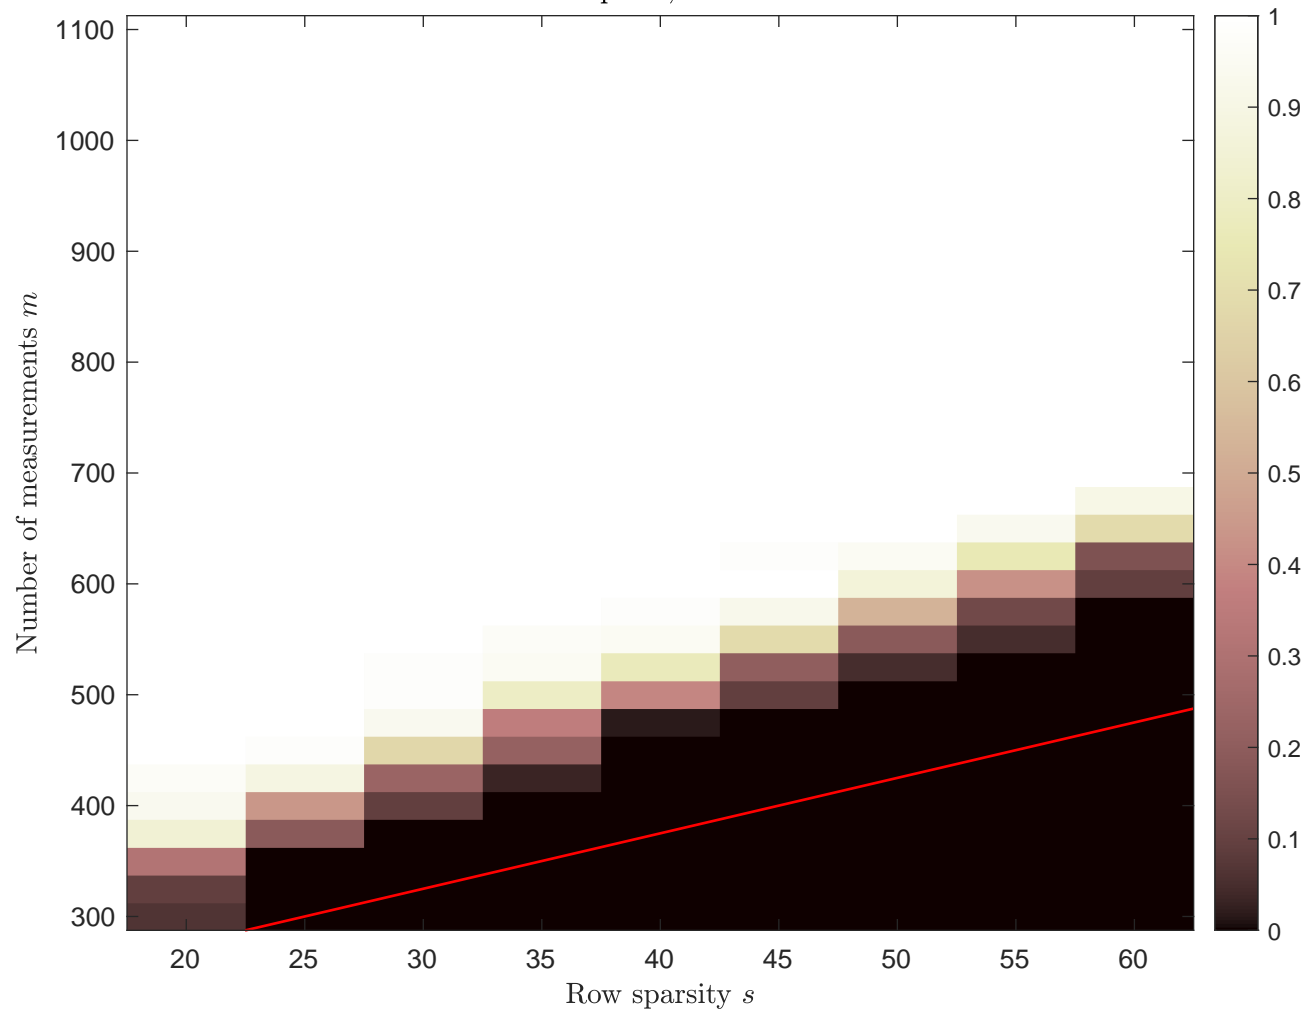

Supplement: supplementary_material [file attachment]

IRLS-LowRankRowSparse, Fourier Measurements

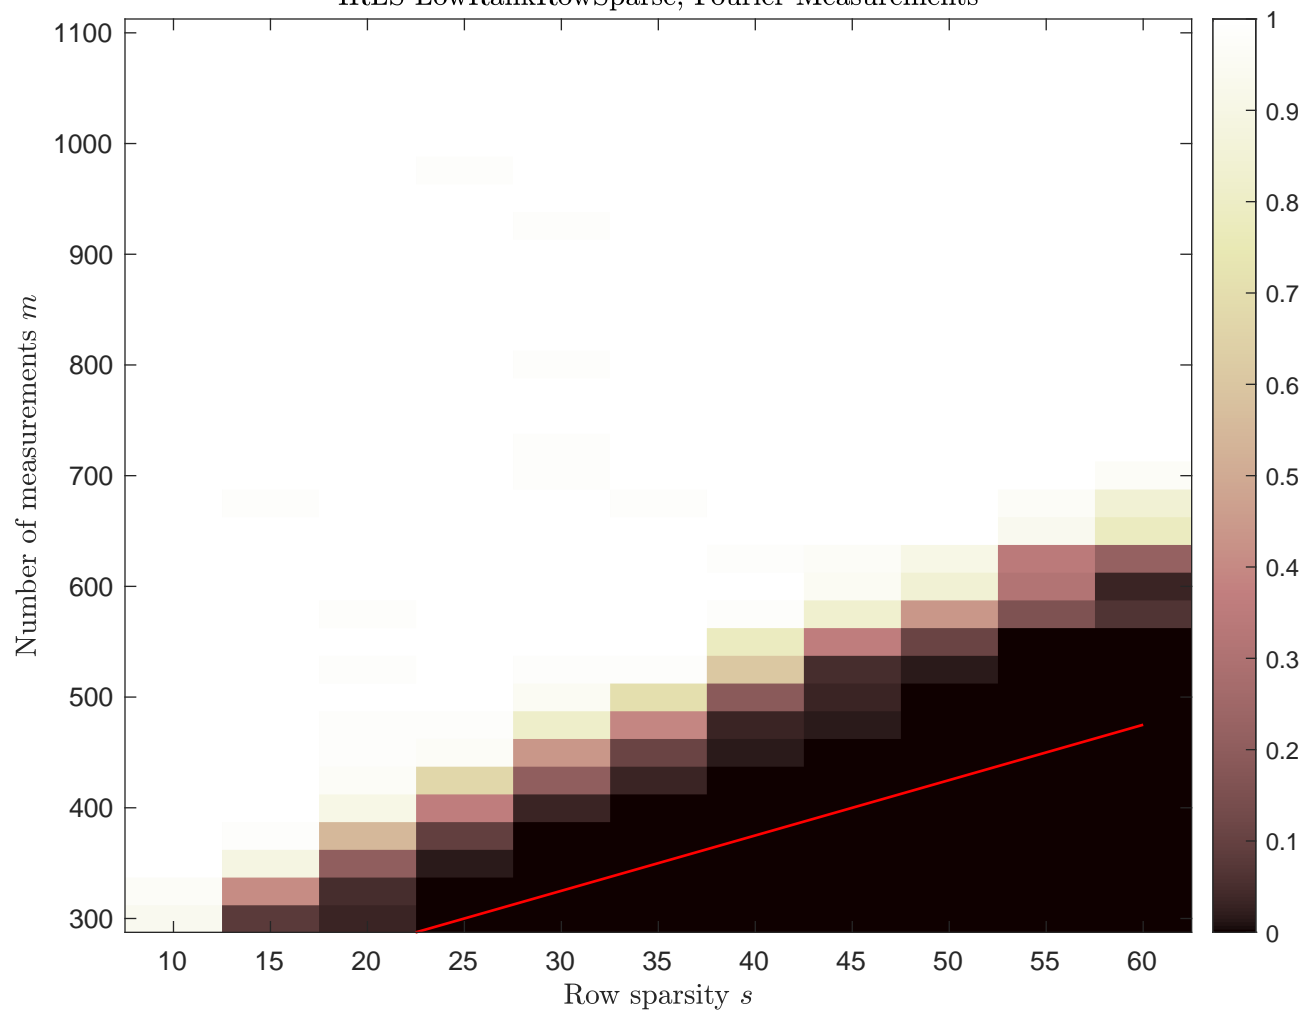

Supplement: supplementary_material [file attachment]

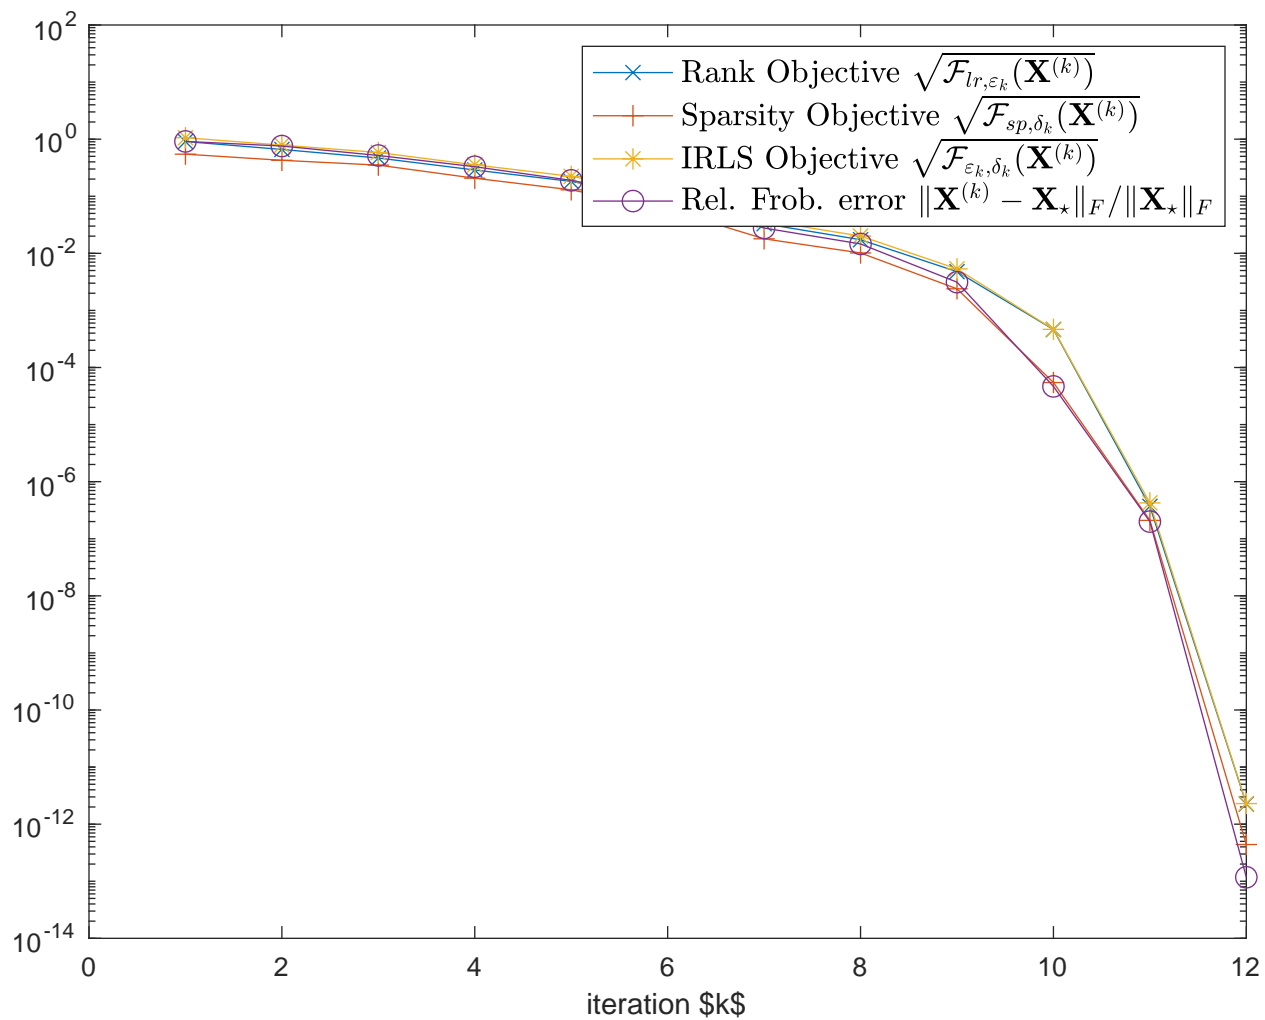

Supplement: supplementary_material [file attachment]

Sparse Power Factorization, Gaussian measurements

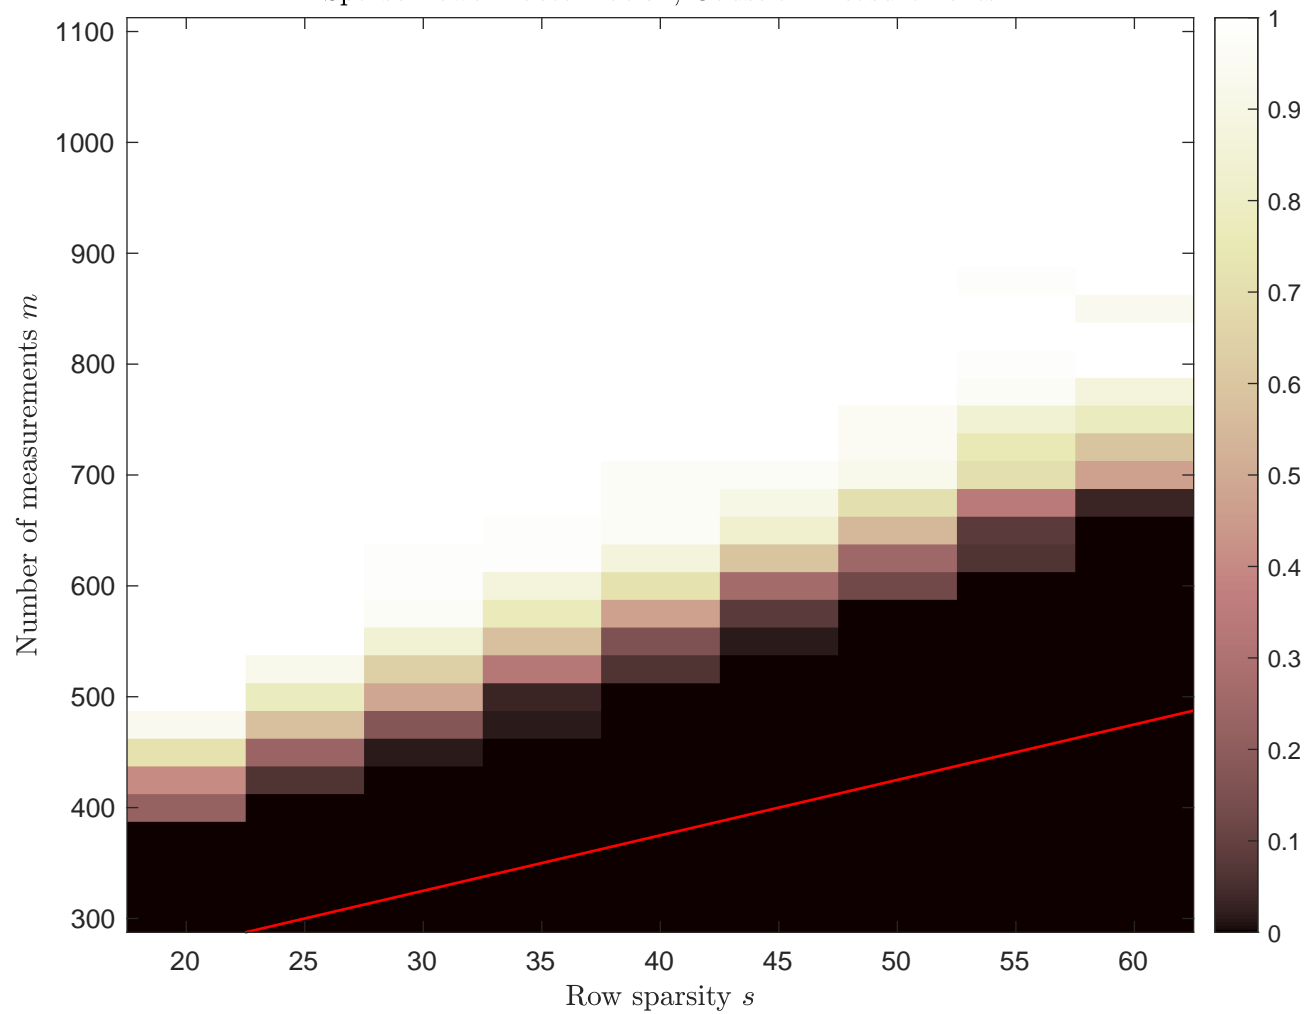

Supplement: supplementary_material [file attachment]

Riemannian Adaptive IHT, Random rank-1 meas.

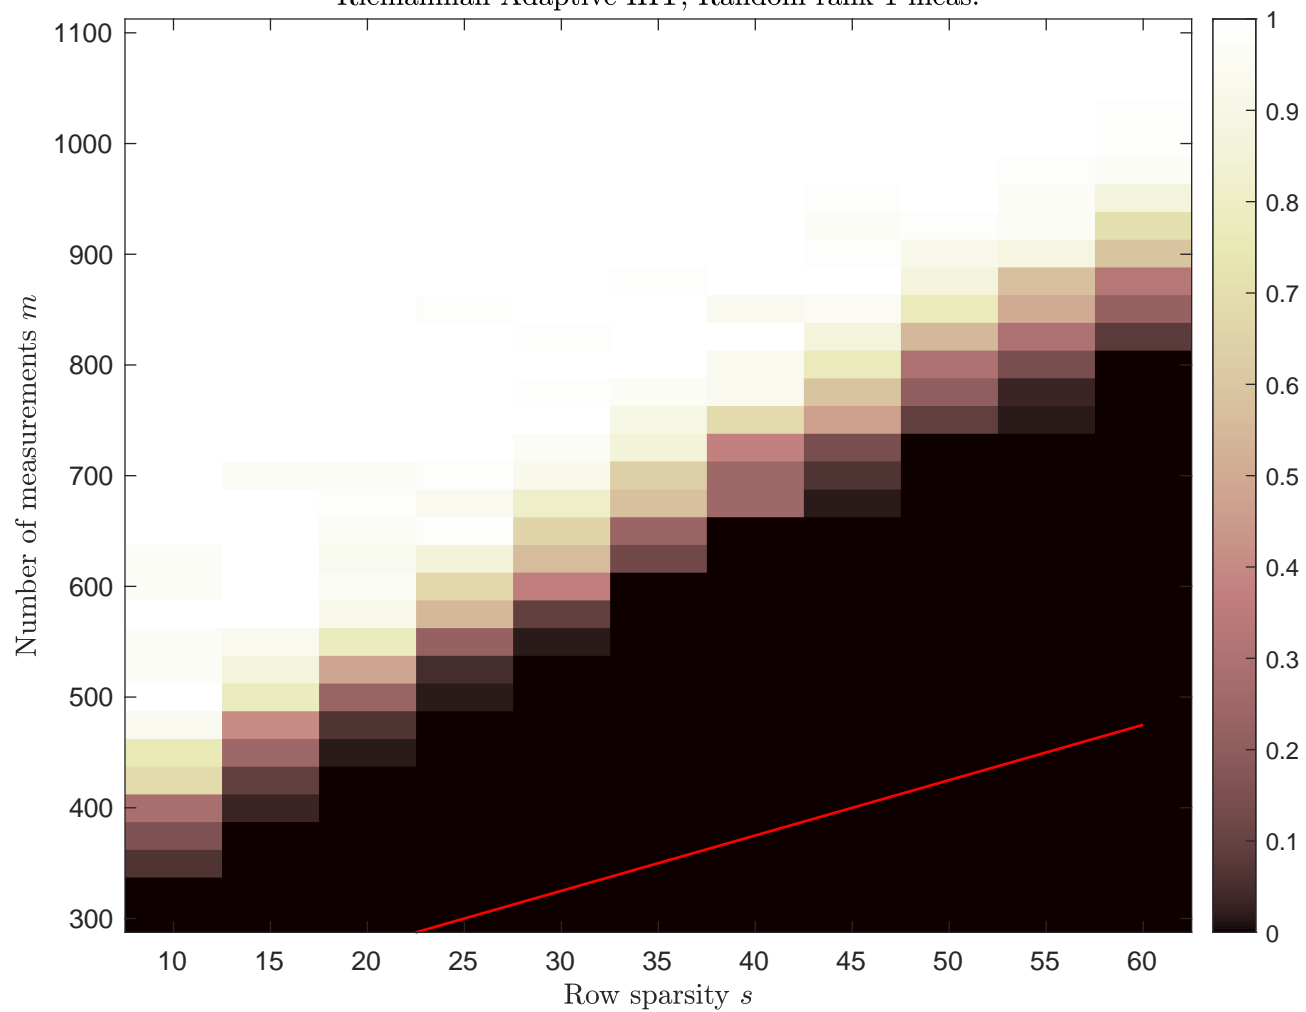

Supplement: supplementary_material [file attachment]

IRLS-LowRankRowSparse, Gaussian measurements

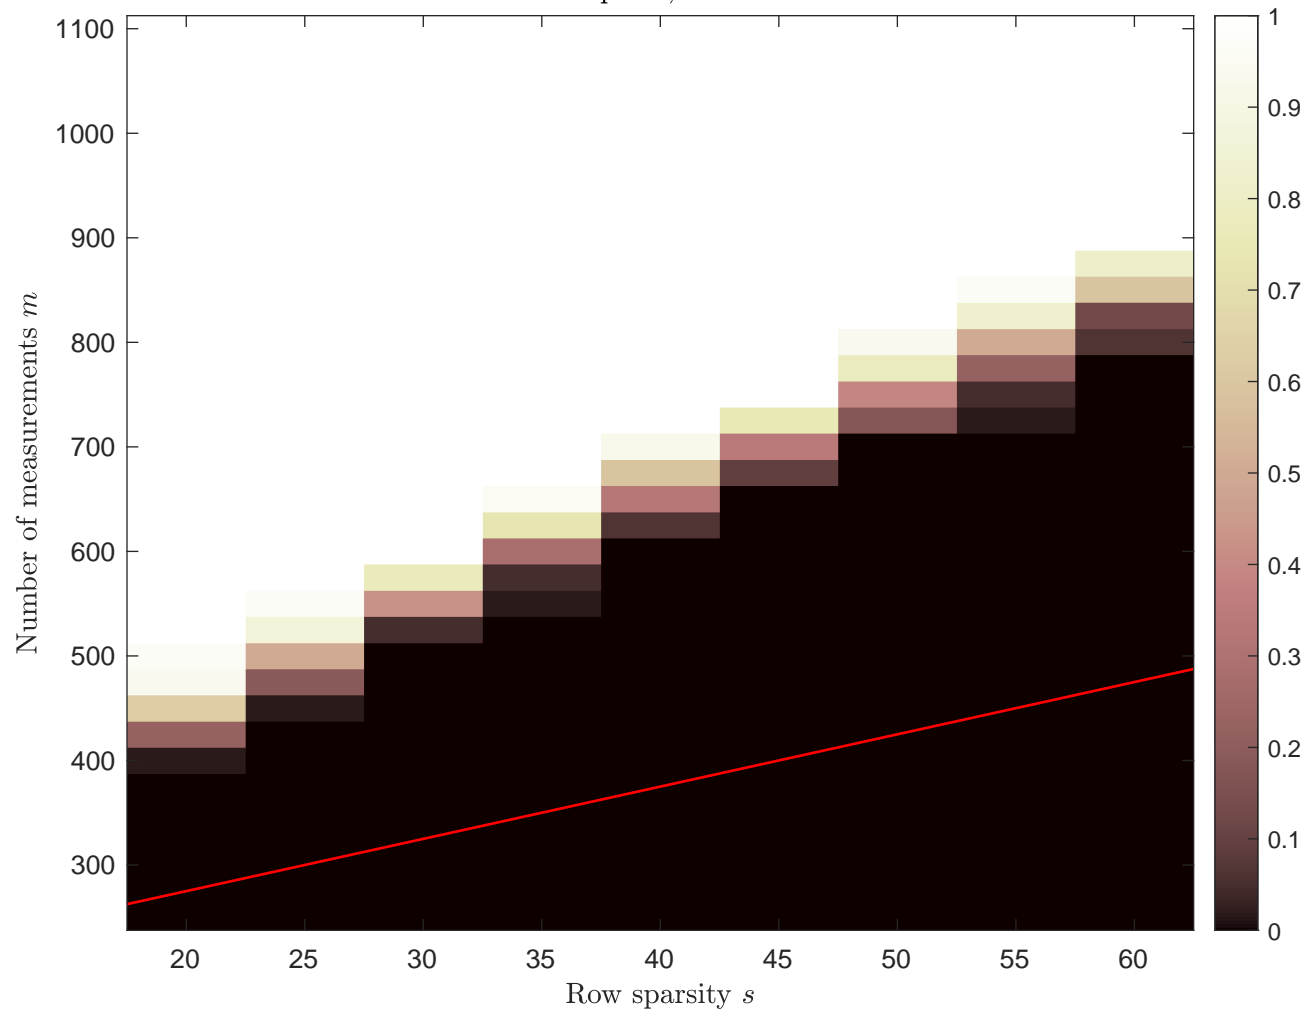

Supplement: supplementary_material [file attachment]

IRLS-LowRankRowSparse, Random rank-1 meas.

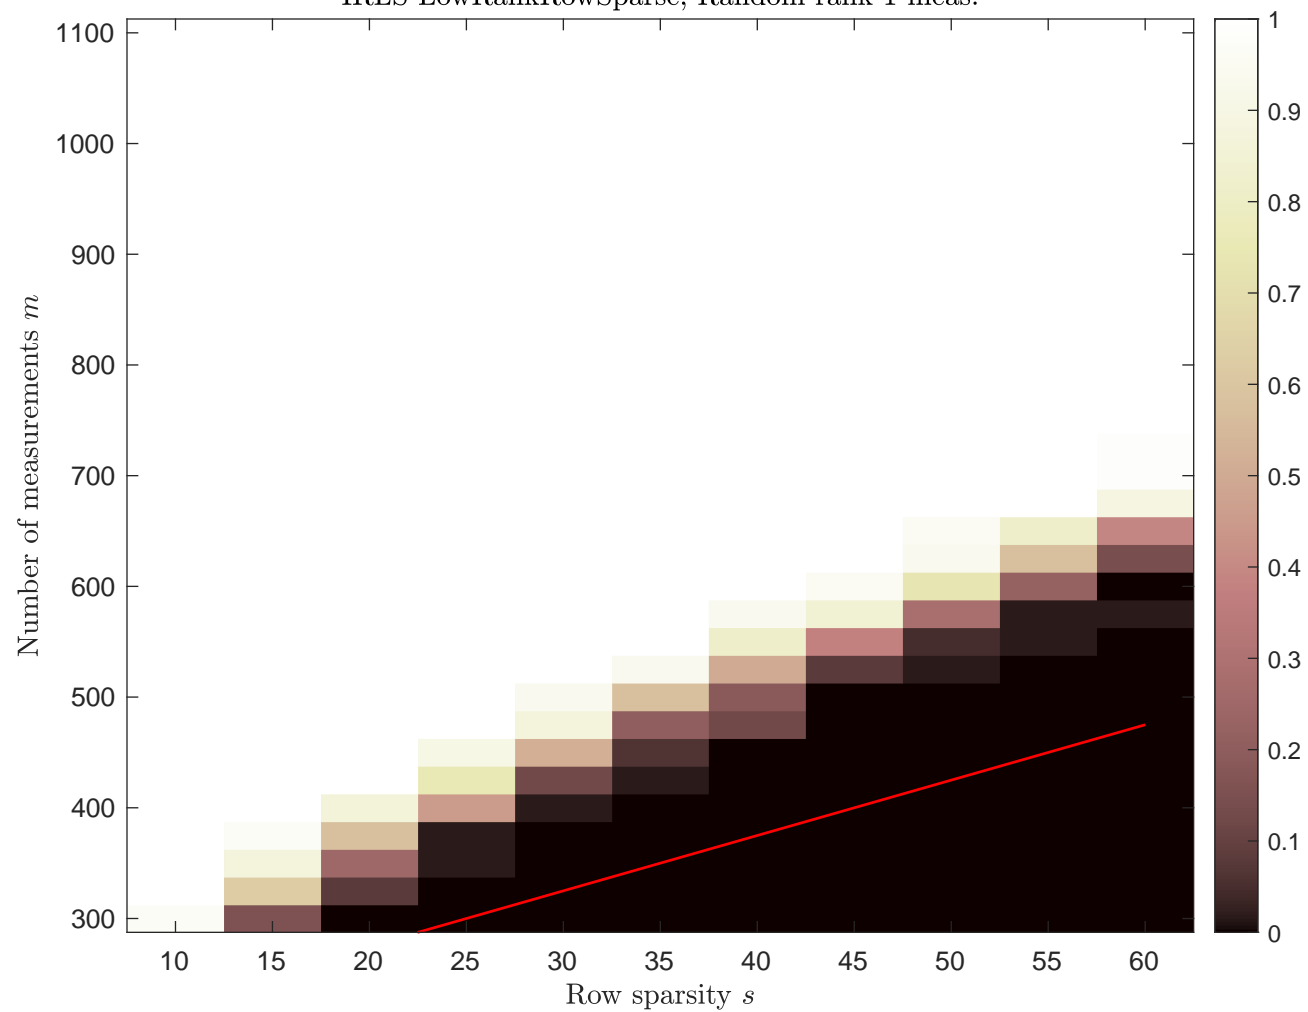

Supplement: supplementary_material [file attachment]

Sparse Power Factorization, Random rank-1 meas.

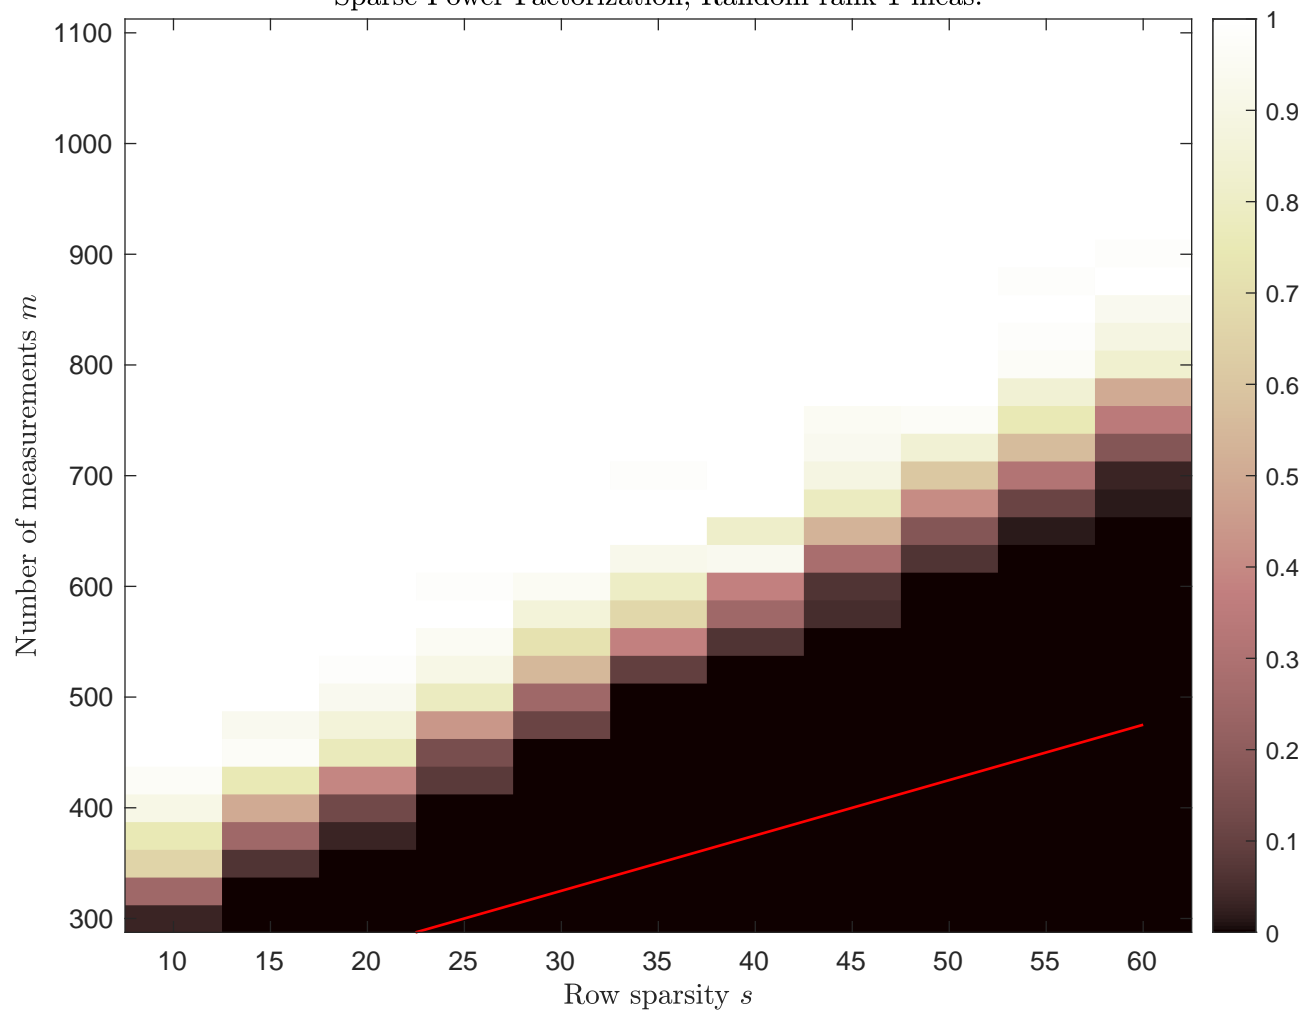

Supplement: supplementary_material [file attachment]

Riemannian Adaptive IHT, Fourier measurements

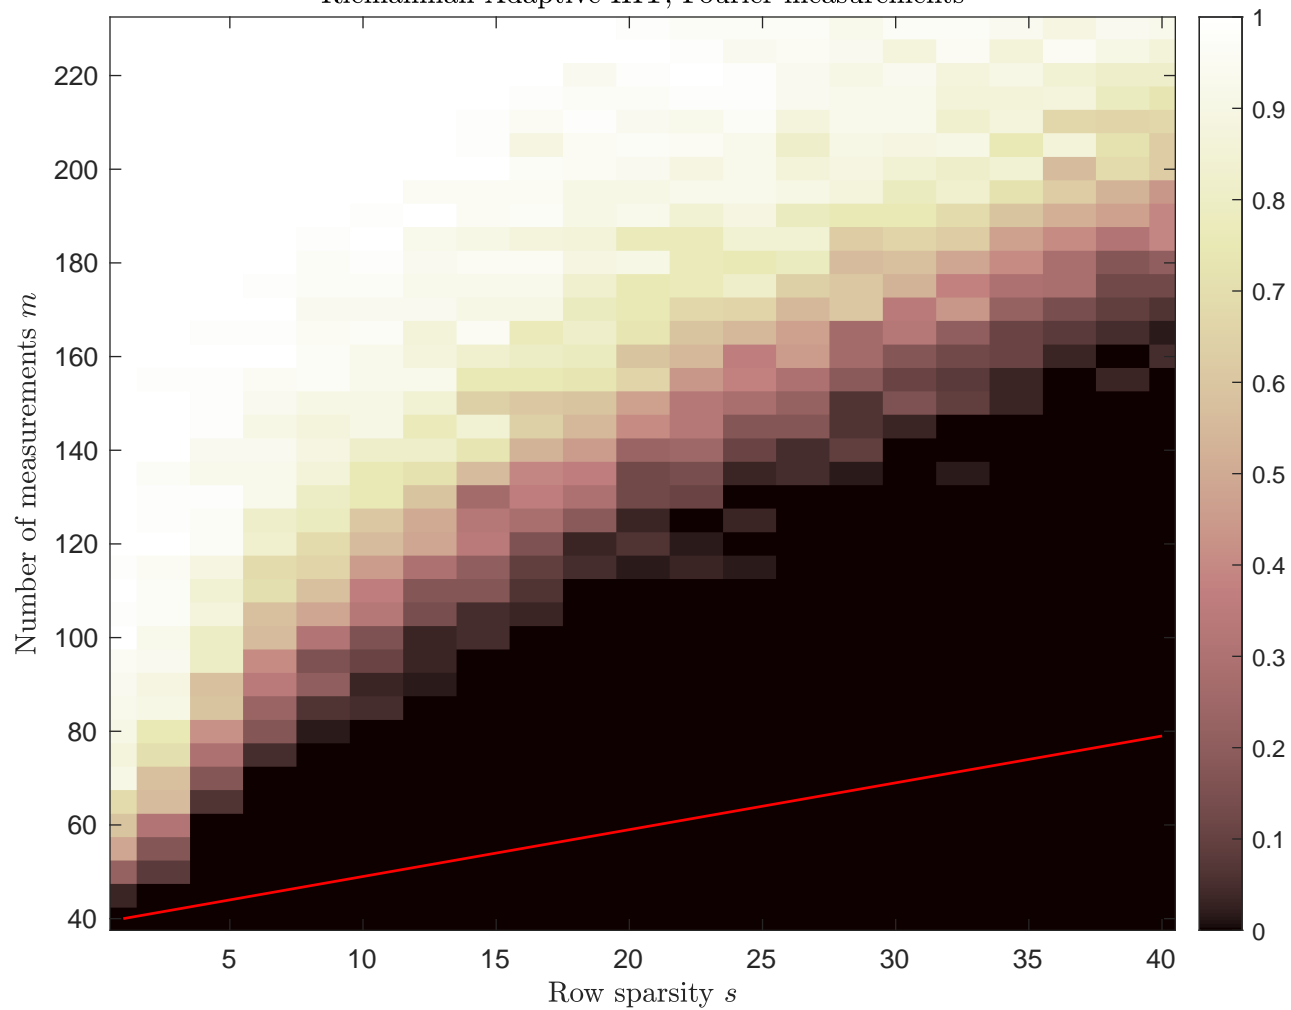

Supplement: supplementary_material [file attachment]

Sparse Power Factorization, Fourier measurements

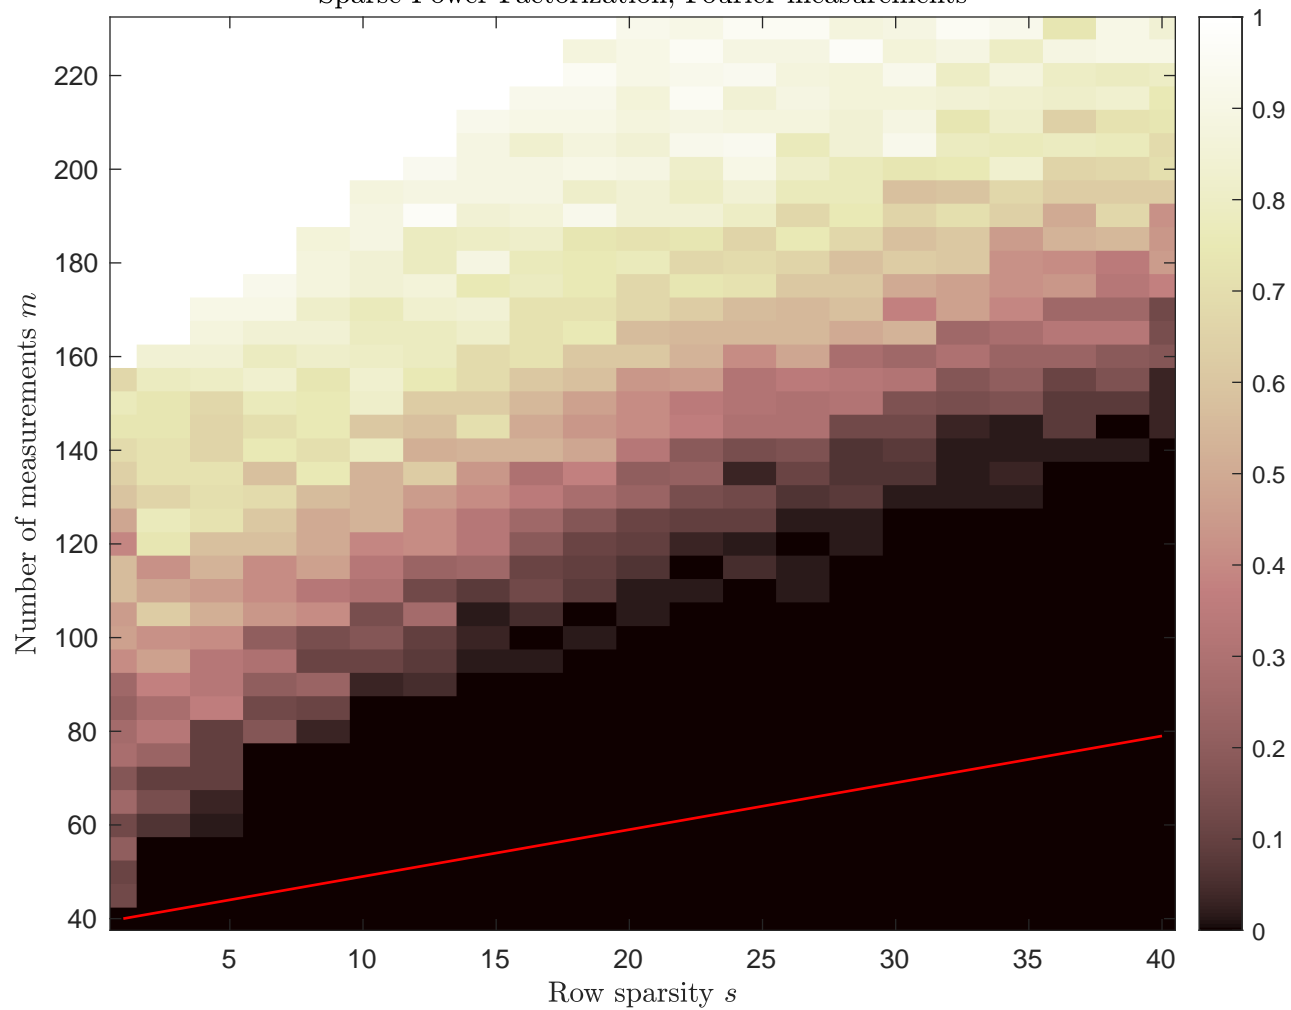

Supplement: supplementary_material [file attachment]

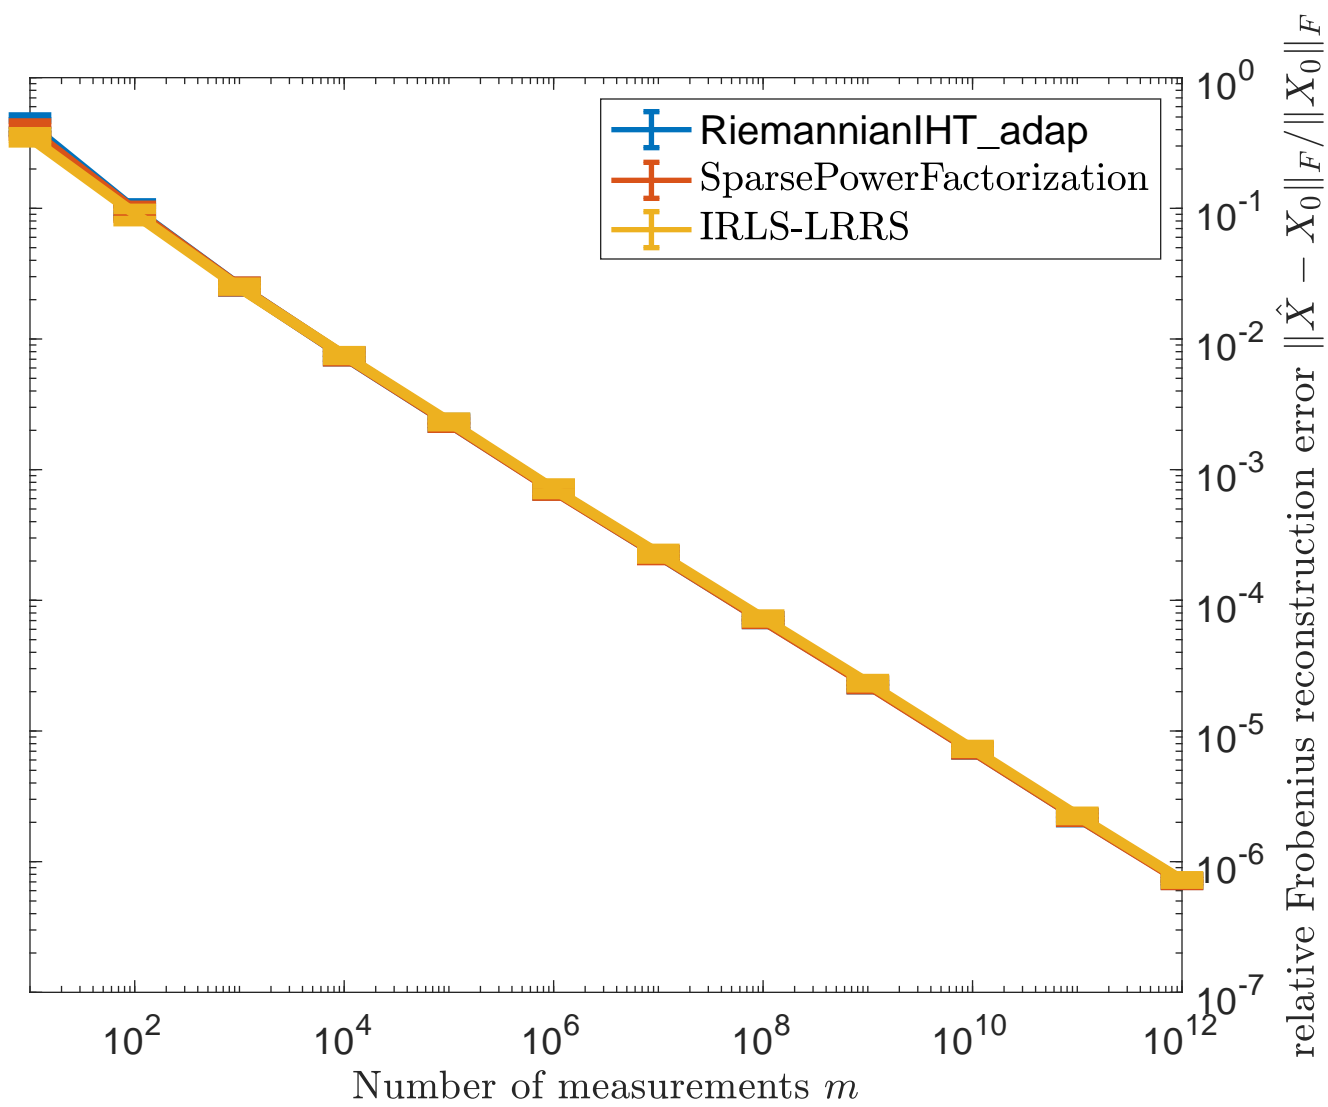

Supplement: supplementary_material [file attachment]

Riemannian Adaptive IHT, Fourier Measurements

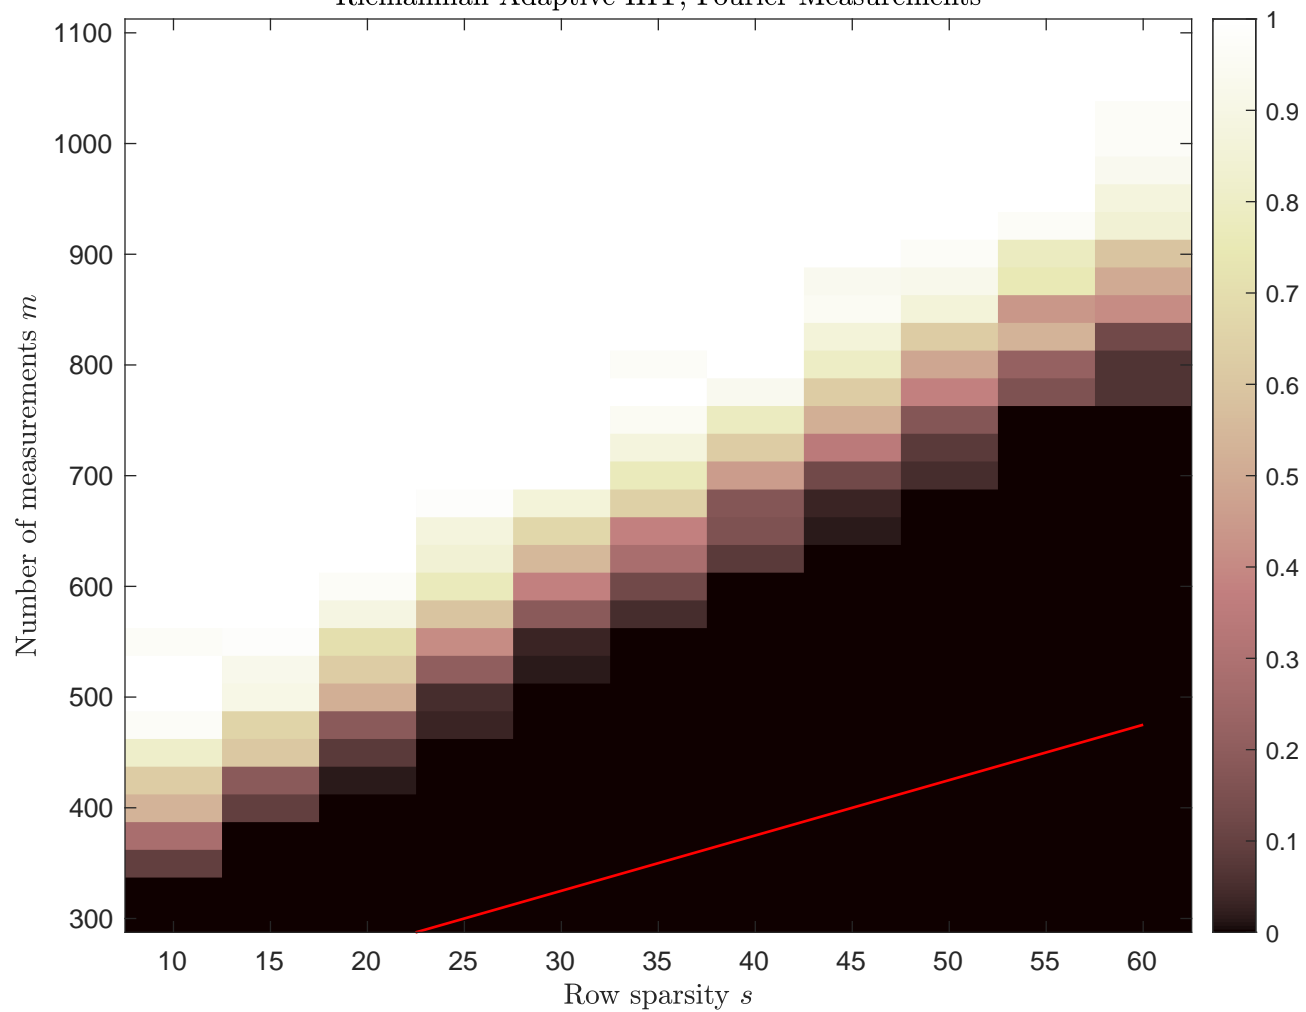

Supplement: supplementary_material [file attachment]

Riemannian Adaptive IHT, Random rank-one meas.

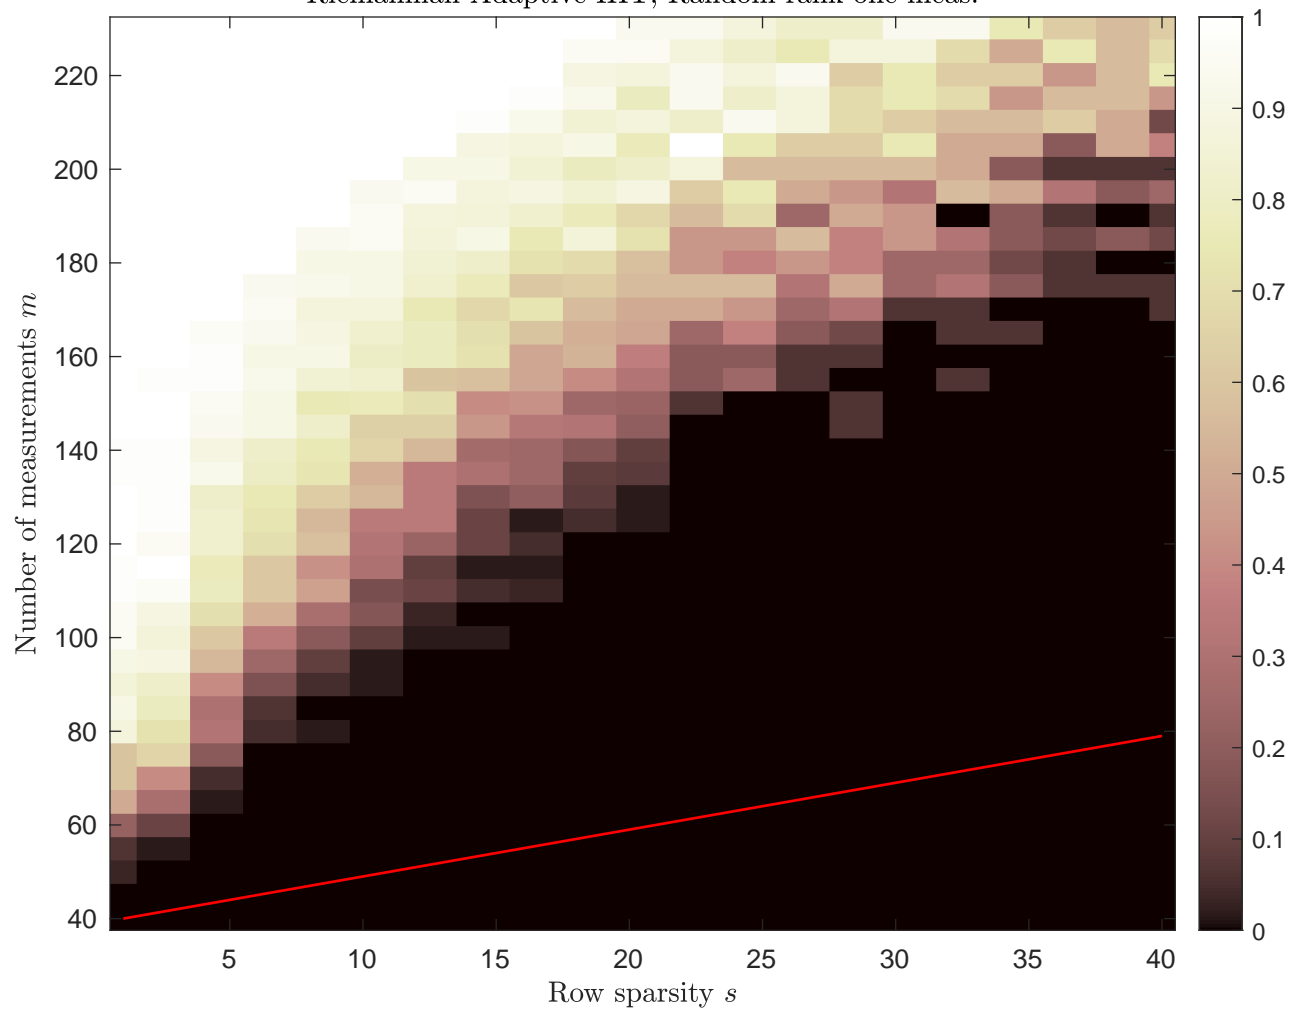

Supplement: supplementary_material [file attachment]

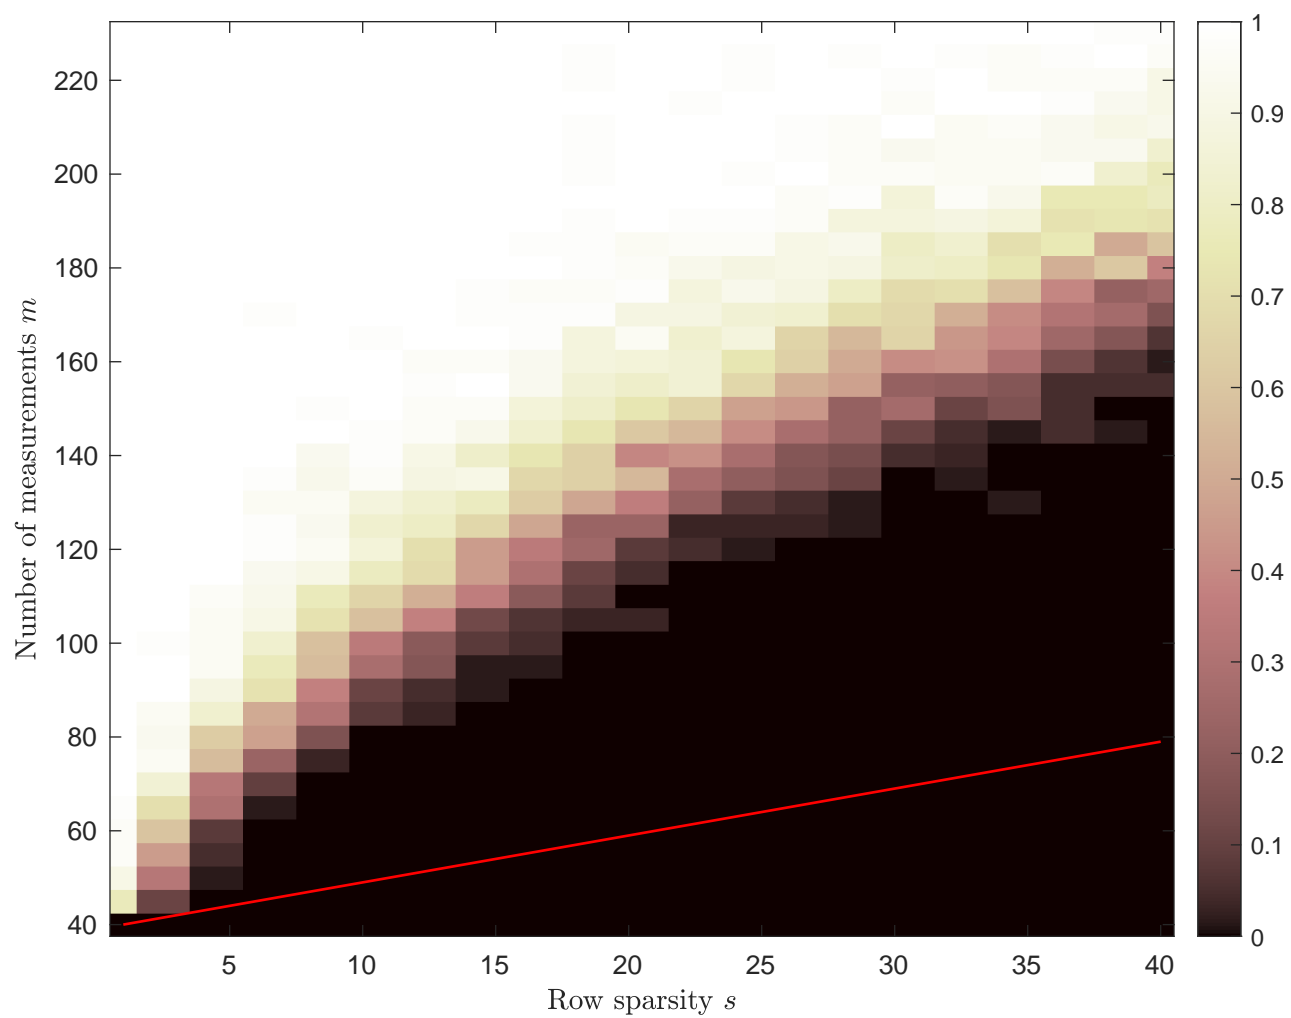

Supplement: supplementary_material [file attachment]

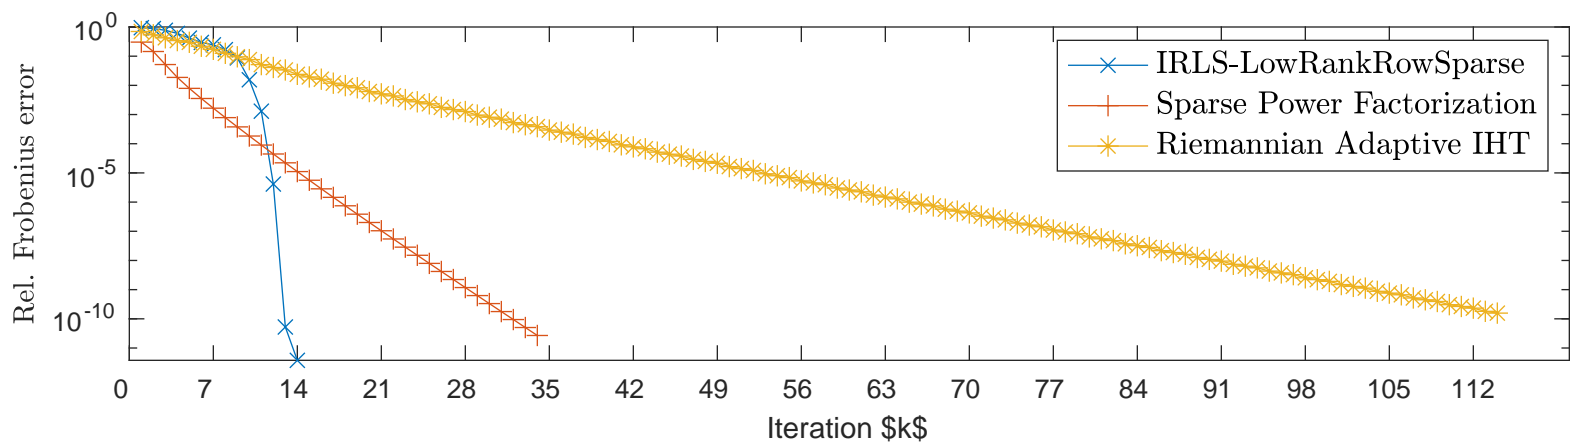

Supplement: supplementary_material [file attachment]

Sparse Power Factorization, Random rank-one meas.

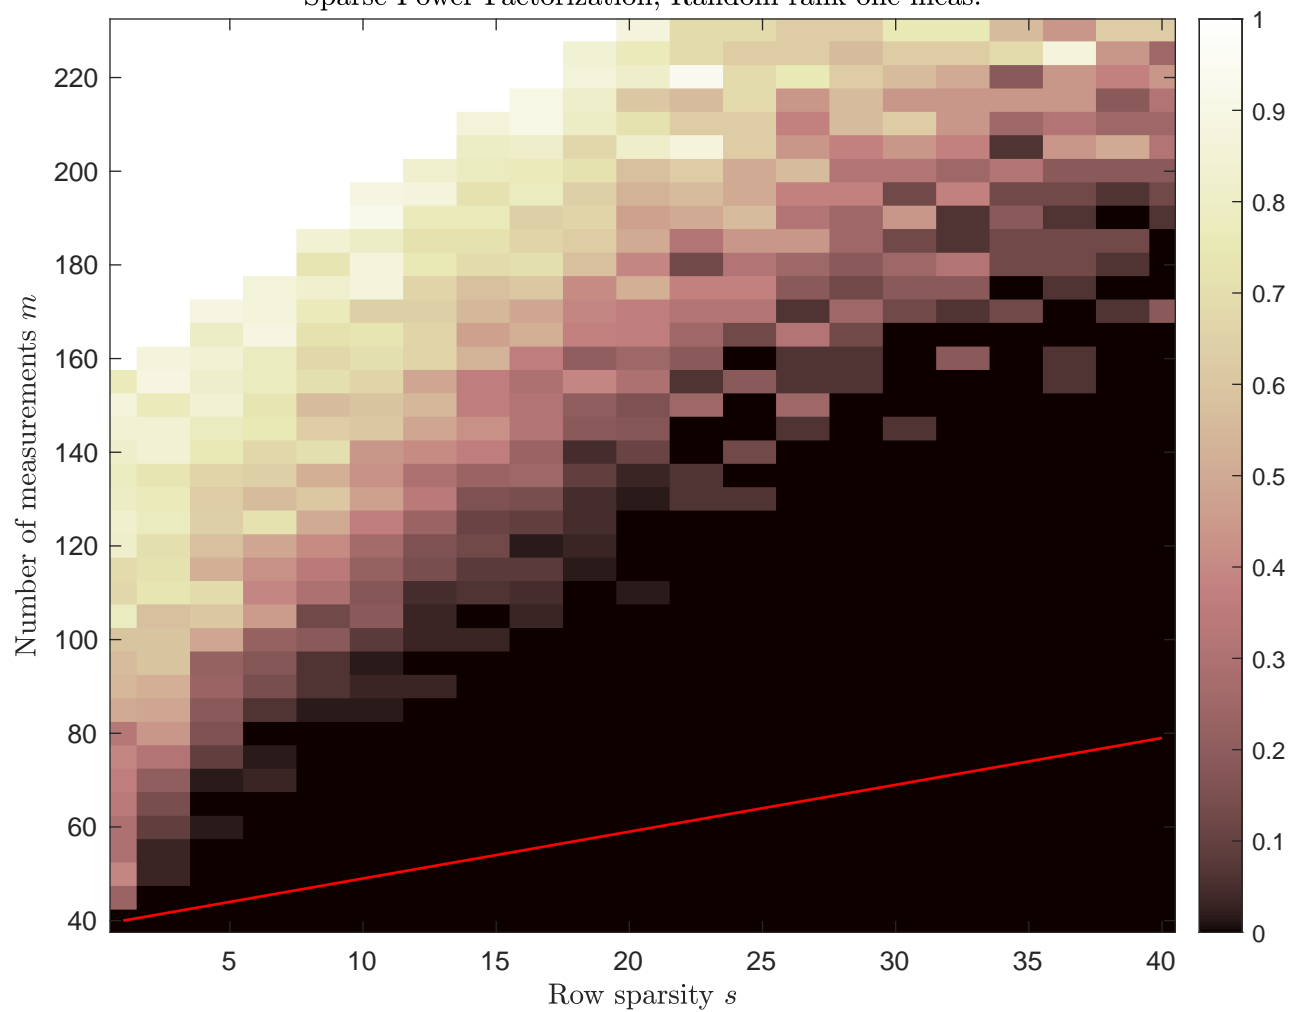

Supplement: supplementary_material [file attachment]

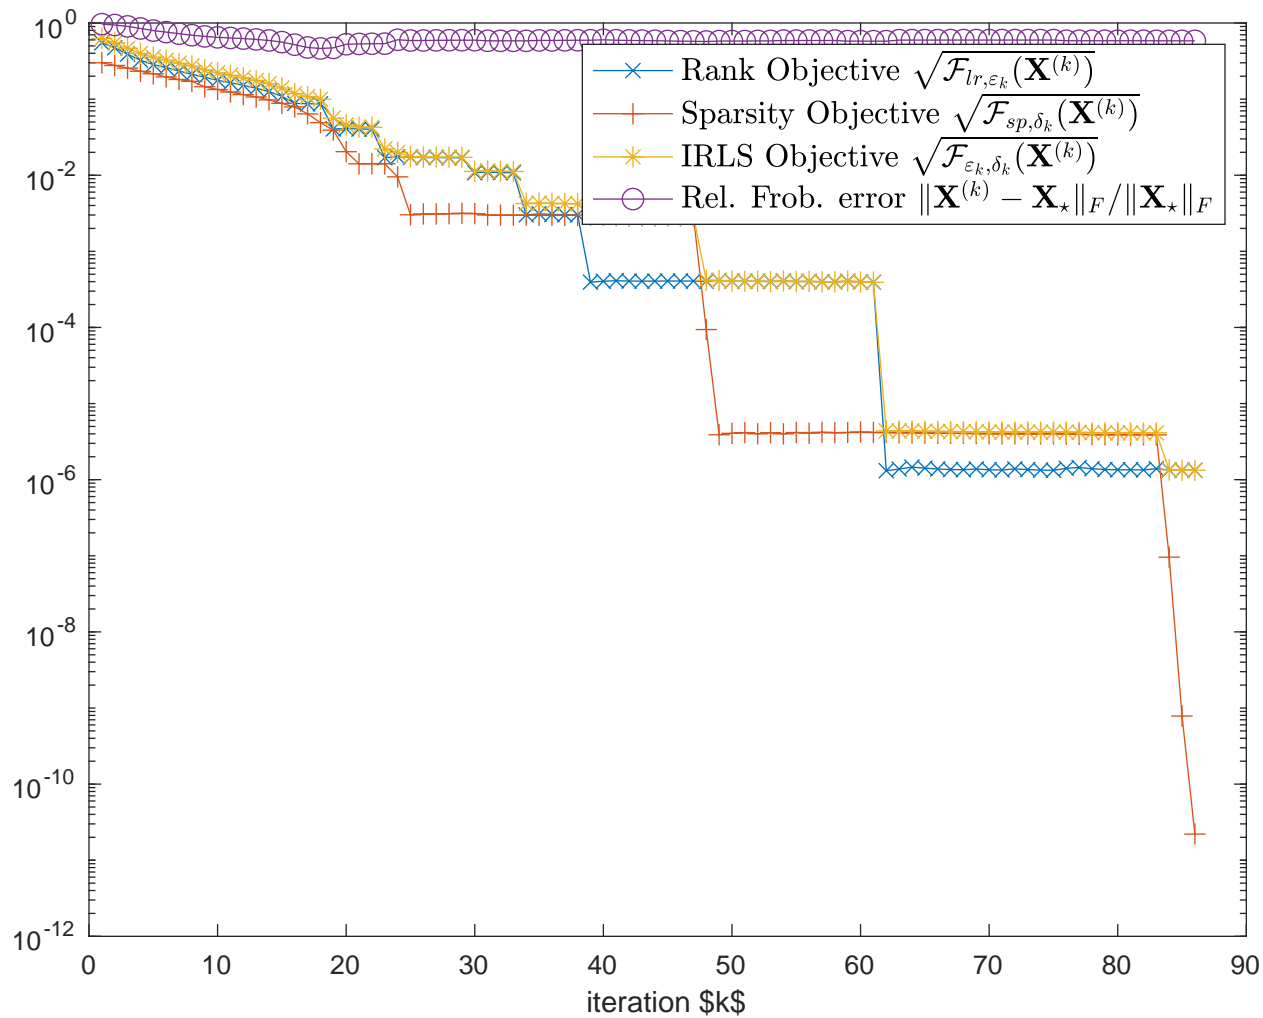

Supplement: supplementary_material [file attachment]

IRLS-LowRankRowSparse, Random rank-one meas.

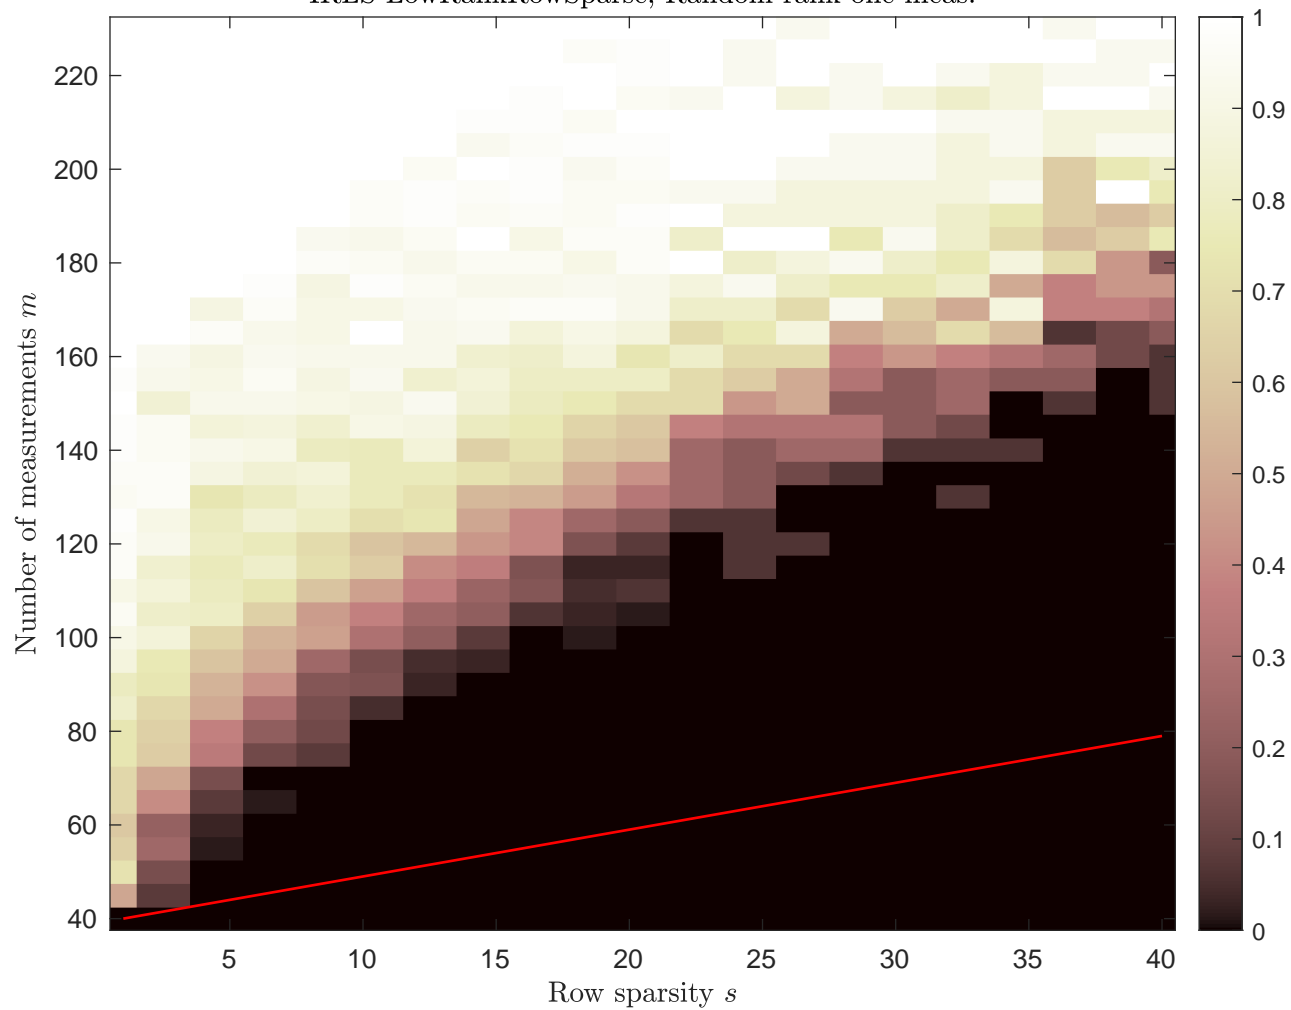

Supplement: supplementary_material [file attachment]

Riemannian Adaptive IHT, Gaussian measurements

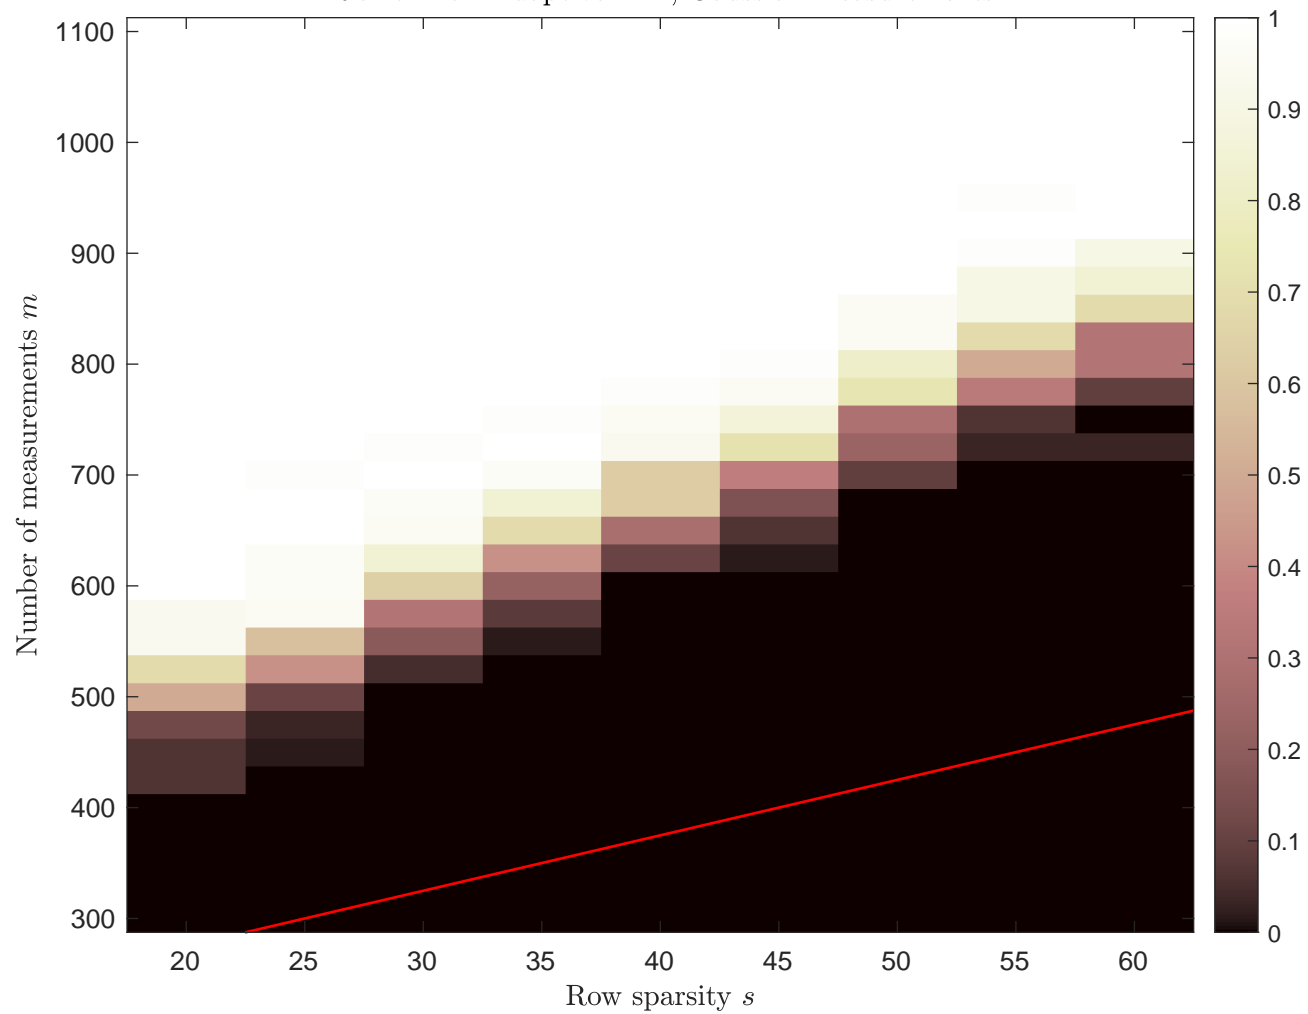

Supplement: supplementary_material [file attachment]
